# Supplementary material for: X-Ray absorption fine structure spectroscopy studies of thermal effects on ion-exchange equilibria
Source: Royal Society of Chemistry journal article supplement (doi:10.1039/c2ra21278a), 2012-01-01
Supplement: c2ra21278a.pdf [file c2ra21278a.pdf]

Supplementary Information for

**X-Ray Absorption Fine Structure Spectroscopy Studies of Thermal Effect on Ion-Exchange Equilibria**

Masami Shibukawa,<sup>a\*</sup> Makoto Harada,<sup>b</sup> Tetsuo Okada,<sup>b</sup> Yawara Ogiyama,<sup>a</sup> Tomomi Shimasaki,<sup>a</sup> Asako Inoue,<sup>a</sup> Yoshiki Kondo,<sup>a</sup> and Shingo Saito<sup>a</sup>

<sup>a</sup>Graduate School of Science and Technology, Saitama University, 255 Shimo-Okubo, Sakura-ku, Saitama, 338-8570, Japan

<sup>b</sup>Department of Chemistry, Tokyo Institute of Technology, Meguro-ku, Tokyo, 152-8551, Japan

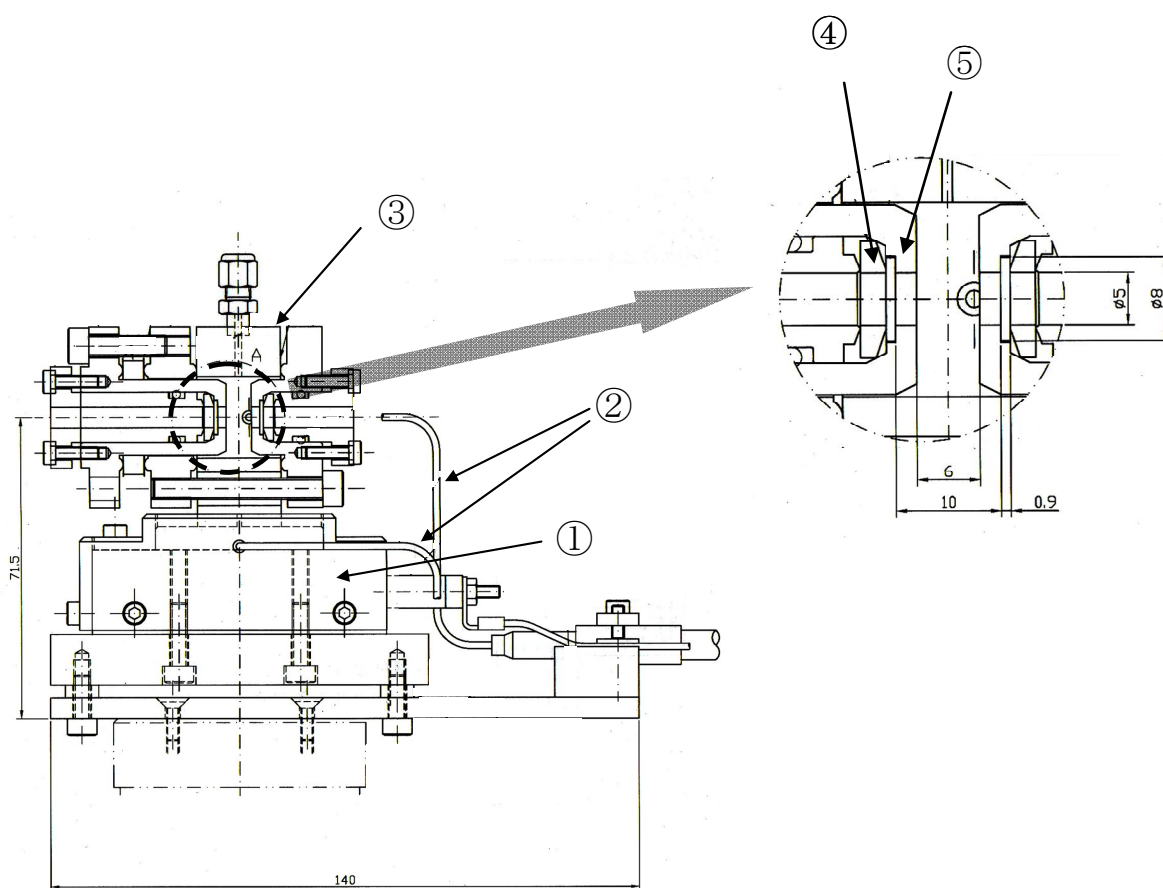

Fig. S1. Structure of the XAFS cell used in this study.

① = heater, ② = thermo couple, ③ = cell, ④ = Ag gasket, ⑤ = Be window

Table S1 Structural parameters of Rb<sup>+</sup>, Sr<sup>2+</sup>, Br<sup>-</sup>, and I<sup>-</sup> in aqueous solution

| Ion              | <i>k</i> range of the fit, Å <sup>-1</sup> | <i>T</i> , °C | <i>N</i> | <i>r</i> , Å | <i>σ</i> , Å | <i>R</i> <sup>a</sup> |
|------------------|--------------------------------------------|---------------|----------|--------------|--------------|-----------------------|
| Rb <sup>+</sup>  | 1.8 – 5.8                                  | 26            | 4.00     | 2.88         | 0.156        | 0.01                  |
|                  |                                            | 81            | 3.48     | 2.87         | 0.157        | 0.02                  |
|                  |                                            | 96            | 3.45     | 2.86         | 0.159        | 0.02                  |
|                  |                                            | 116           | 3.26     | 2.86         | 0.159        | 0.02                  |
|                  |                                            | 134           | 3.10     | 2.85         | 0.158        | 0.02                  |
|                  |                                            | 153           | 3.20     | 2.84         | 0.165        | 0.02                  |
|                  |                                            | 172           | 2.99     | 2.83         | 0.161        | 0.03                  |
| Sr <sup>2+</sup> | 2.8 – 10.2                                 | 29            | 8.00     | 2.62         | 0.103        | 0.04                  |
|                  |                                            | 77            | 7.45     | 2.62         | 0.107        | 0.05                  |
|                  |                                            | 96            | 7.39     | 2.61         | 0.107        | 0.05                  |
|                  |                                            | 115           | 7.04     | 2.60         | 0.106        | 0.05                  |
|                  |                                            | 134           | 6.94     | 2.61         | 0.108        | 0.05                  |
|                  |                                            | 153           | 6.79     | 2.62         | 0.108        | 0.05                  |
|                  |                                            | 173           | 6.70     | 2.61         | 0.111        | 0.06                  |
| Br <sup>-</sup>  | 1.8 – 6.0                                  | 29            | 6.00     | 3.27         | 0.176        | 0.03                  |
|                  |                                            | 79            | 5.78     | 3.25         | 0.186        | 0.03                  |
|                  |                                            | 99            | 5.37     | 3.24         | 0.183        | 0.03                  |
|                  |                                            | 118           | 5.16     | 3.24         | 0.183        | 0.03                  |
|                  |                                            | 137           | 4.67     | 3.24         | 0.184        | 0.03                  |
| I <sup>-</sup>   | 2.5 – 6.0                                  | 27            | 6.00     | 3.64         | 0.159        | 0.03                  |
|                  |                                            | 78            | 5.47     | 3.65         | 0.166        | 0.03                  |
|                  |                                            | 100           | 5.21     | 3.65         | 0.168        | 0.03                  |
|                  |                                            | 119           | 4.87     | 3.65         | 0.169        | 0.03                  |
|                  |                                            | 139           | 4.69     | 3.65         | 0.175        | 0.04                  |
|                  |                                            | 160           | 4.48     | 3.66         | 0.175        | 0.03                  |

<sup>a</sup> Goodness of fit.

Table S2 Structural parameters of Rb<sup>+</sup> and Sr<sup>2+</sup> in water swollen and dried cation-exchange resins

| Ion              | <i>k</i> range of the fit, Å <sup>-1</sup> | resin <sup>a</sup> | <i>T</i> , °C | <i>N</i> | <i>r</i> , Å | <i>σ</i> , Å | <i>R</i> <sup>b</sup> |
|------------------|--------------------------------------------|--------------------|---------------|----------|--------------|--------------|-----------------------|
| Rb <sup>+</sup>  | 1.3 – 5.8                                  | w                  | 28            | 4.01     | 2.91         | 0.160        | 0.01                  |
|                  |                                            | w                  | 79            | 3.86     | 2.88         | 0.170        | 0.02                  |
|                  |                                            | w                  | 96            | 3.92     | 2.88         | 0.174        | 0.02                  |
|                  |                                            | w                  | 115           | 3.91     | 2.86         | 0.177        | 0.02                  |
|                  |                                            | w                  | 135           | 3.97     | 2.87         | 0.182        | 0.02                  |
|                  |                                            | w                  | 154           | 3.82     | 2.86         | 0.182        | 0.02                  |
|                  |                                            | w                  | 176           | 3.65     | 2.85         | 0.184        | 0.02                  |
|                  |                                            | d                  | 34            | 3.00     | 2.94         | 0.153        | 0.07                  |
| Sr <sup>2+</sup> | 2.8 – 10.2                                 | w                  | 29            | 7.10     | 2.58         | 0.094        | 0.05                  |
|                  |                                            | w                  | 78            | 7.02     | 2.61         | 0.104        | 0.05                  |
|                  |                                            | w                  | 96            | 7.01     | 2.60         | 0.105        | 0.05                  |
|                  |                                            | w                  | 115           | 7.00     | 2.61         | 0.110        | 0.05                  |
|                  |                                            | w                  | 134           | 6.88     | 2.60         | 0.113        | 0.05                  |
|                  |                                            | w                  | 154           | 6.82     | 2.59         | 0.113        | 0.05                  |
|                  |                                            | w                  | 173           | 6.49     | 2.59         | 0.110        | 0.07                  |
|                  |                                            | d                  | 34            | 5.16     | 2.51         | 0.110        | 0.08                  |

<sup>a</sup> w: water swollen resin; d: dried resin

<sup>b</sup> Goodness of fit.
